# Supplementary material for: Accelerated galvanic interaction for the fabrication of core–shell nanowires to boost the hydrogen evolution reaction
Source: Royal Society of Chemistry journal article supplement (doi:10.1039/d4nr03876b), 2024-12-04
Supplement: d4nr03876b1.pdf [file d4nr03876b1.pdf]

## Supporting information

### Accelerated galvanic interaction for the fabrication of core-shell nanowire to boost hydrogen evolution reaction

Zhongyun Yang <sup>a</sup>, Xiaojia Zhang <sup>a,1</sup>, Fan Yang <sup>a</sup>, Muhammad Waqas <sup>b</sup>, Yufeng Peng <sup>a</sup>, Limin Wang <sup>a</sup>, Qiulan Huang <sup>a</sup>, Dajuan Huang <sup>a</sup>, Dingrong Deng <sup>c</sup>, Du-Hong Chen <sup>a,\*</sup>, Youjun Fan <sup>a,\*</sup>, and Wei Chen <sup>a,\*</sup>

<sup>a</sup> School of Chemistry and Pharmaceutical Sciences, Guangxi Normal University, Guilin 541004, China.

<sup>b</sup> Guangdong Key Laboratory for Biomedical Measurements and Ultrasound Imaging, National-Regional Key Technology Engineering Laboratory for Medical Ultrasound, School of Biomedical Engineering, Shenzhen University Medical School, Shenzhen 518060, China.

<sup>c</sup> School of Marin Equipment and Mechanical Engineering, Jimei University, Xiamen 361000, China

---

\* Corresponding authors.

<sup>1</sup> These authors contributed equally to this work.

*E-mail addresses:* dhchen@gxnu.edu.cn (D. Chen), youjunfan@mailbox.gxnu.edu.cn (Y. Fan), weichen@gxnu.edu.cn (W. Chen).

## ***1 Reagents***

Polyvinylpyrrolidone (PVP, MW = 360000, analytical grade) was ordered from Sigma-Aldrich. Silver nitrate ( $\text{AgNO}_3$ , 99%) was obtained from Alfa Aesar. Ferric chloride hexahydrate ( $\text{FeCl}_3 \cdot 6\text{H}_2\text{O}$ , analytical grade) was purchased from McClean. Ethylene glycol (EG, analytical grade) was subscribed from Xilong Scientific Co., Ltd. Ruthenium trichloride hexahydrate ( $\text{RuCl}_3 \cdot 6\text{H}_2\text{O}$ , analytical grade) was ordered from Aladdin.  $\text{RuO}_2$  (99 wt%), Pt/C (20 wt%) and Nafion solution (5 wt%) were purchased from Sigma-Aldrich. All reagents were used without further modification.

## ***2 The synthesis process of Ag NWs***

To synthesize Ag NWs, 0.2 g of PVP was gradually dissolved in 7 mL of EG solution at 60 °C. After cooling down at 20 °C, 0.25 g of  $\text{AgNO}_3$  was further ultrasonically dissolved in the abovementioned solution, followed by the addition of 1.75 mL of 0.6 M  $\text{FeCl}_3$  EG. After rigorously stirring for 1 minute, transferring to an oven and reacting for 1 hour at 150 °C to generate a black gel. The obtained black gel was further dialyzed to remove impurities. Finally, the Ag NWs were grasped after lyophilization.

## ***3 The preparation of Ru@Ag/AgCl catalysts***

To prepare Ru@Ag/AgCl catalysts, first, 2 mg of Ag NWs was mixed with 2 mL of deionized water to form a homogeneous solution under ultrasonication for 30 minutes. Subsequently, 30  $\mu\text{L}$  of the obtained solution was dropwise added on the pre-treated glass carbon electrode ( $0.19625 \text{ cm}^2$ ), dried at 25 °C, and then used as the

working electrode ( $0.152 \text{ mg cm}^{-2}$ ). Carbon rod and Hg/HgO electrode were worked as counter and reference electrodes, respectively. The deposition of Ru on the surface of Ag NWs was obtained by the CV operating from 0.28 to 0.6 V (vs. RHE) at  $50 \text{ mV s}^{-1}$  in 0.1 M  $\text{RuCl}_3$  solution. After 100, 200, 300, and 400 cycles of CV operation, the obtained Ru@Ag/AgCl-100, Ru@Ag/AgCl-200, Ru@Ag/AgCl-300, and Ru@Ag/AgCl-400 catalyst used as the working electrode for the following electrochemical measurements conducted in 1 M KOH, respectively. For the other control experiments, 2 mg of commercial Pt/C was evenly dissolved in a mixed solution containing ethyl alcohol and water to form a catalyst ink. Then, 25  $\mu\text{L}$  of the obtained catalyst ink was dropwise added on the pre-treated glass carbon electrode. The Ru electrode was prepared by the deposition of  $\text{Ru}^{3+}$  on the pre-treated glassy carbon electrode. The potential window of CV ranges from 0.28 to 0.6 V (vs. RHE) at the scanning rate of  $50 \text{ mV s}^{-1}$ .

#### ***4 Electrochemical measurements***

The Ru@Ag/AgCl modified working electrode for HER was executed in 1 M KOH solution. The CV operation at  $-0.3$  to 0 V (vs. RHE) was executed to activate the prepared catalysts. Then, linear sweep voltammetry (LSV) was used to evaluate the electro-catalysis performance of the obtained samples. The potential window ranges from  $-0.3$  to 0 V (vs. RHE), and the sweep rate was  $5 \text{ mV s}^{-1}$ . The electrical conductivity of catalysts was achieved by using electrochemical impedance spectroscopy (EIS). Meanwhile, the values of double-electrochemical-layer ( $C_{dl}$ ) of the prepared catalysts were obtained by the multiple CV measurements in a given potential

window (0.2 – 0.3 V vs. RHE) under different scan rates (40, 60, 80, 100, and 120 mV s<sup>-1</sup>). The durability of catalysts was assessed by chronopotentiometry (CP) and CV. The displayed potential was converted into reversible hydrogen electrode (RHE) according to the previous reports.<sup>1-4</sup>

### ***5 Water splitting measurements***

To synthesize the RuO<sub>2</sub>-coated electrode for water splitting, 1 mg of RuO<sub>2</sub> was evenly dispersed in a mixed solution containing 475 μL of EG and 25 μL of Nafion. Then, 15 μL of mixed solution was dripped onto the pre-treated glass carbon electrode, which possesses a load capacity of 0.152 mg cm<sup>-2</sup>. Differing in the aforementioned electrochemical measurements, the water splitting measurement was conducted using a two-electrode system that Ru@Ag/AgCl-200 catalyst worked as the cathode and RuO<sub>2</sub> catalysts used as the anode. Chronoamperometry (CA) was utilized to detect the stability of prepared catalysts for water splitting.

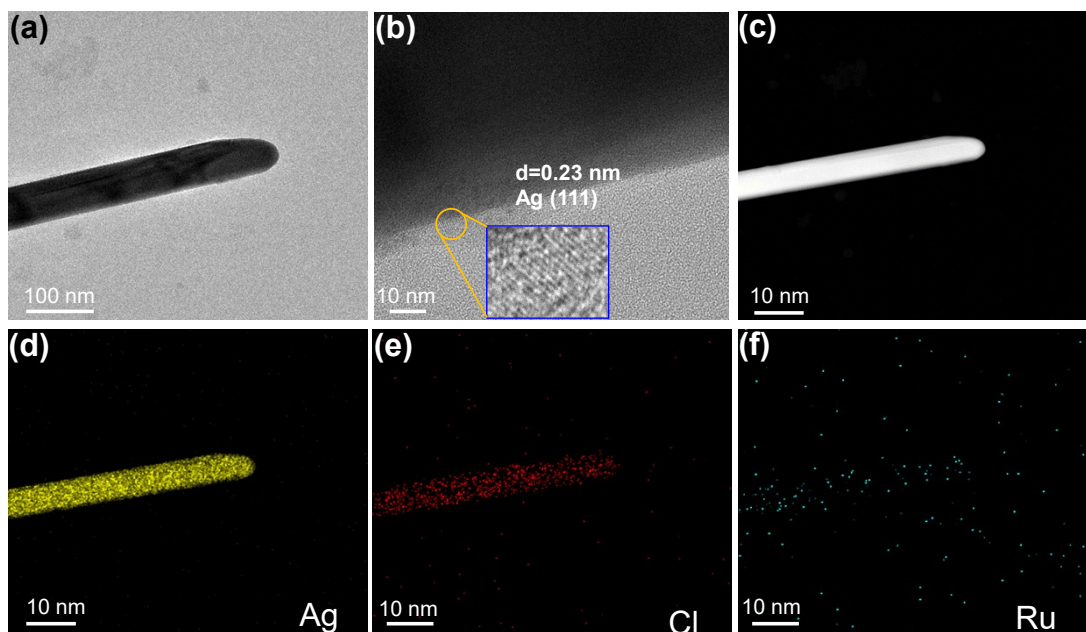

Fig. S1. (a) Transmission electron microscope (TEM), (b) high-resolution transmission electron microscope (HR-TEM) and (d-f) energy dispersive spectroscopy (EDS) mapping images for Ag nanowires (NWs) soaking  $\text{RuCl}_3 \cdot 9\text{H}_2\text{O}$  solution for 5 h.

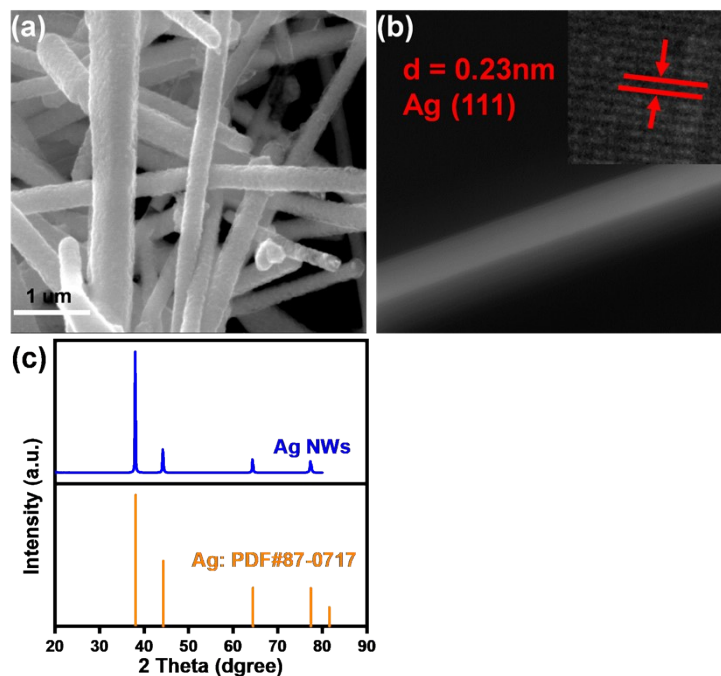

Fig. S2. (a) Scanning electron microscopy (SEM), (b) TEM, (c) X-ray diffraction (XRD) patterns of Ag NWs.

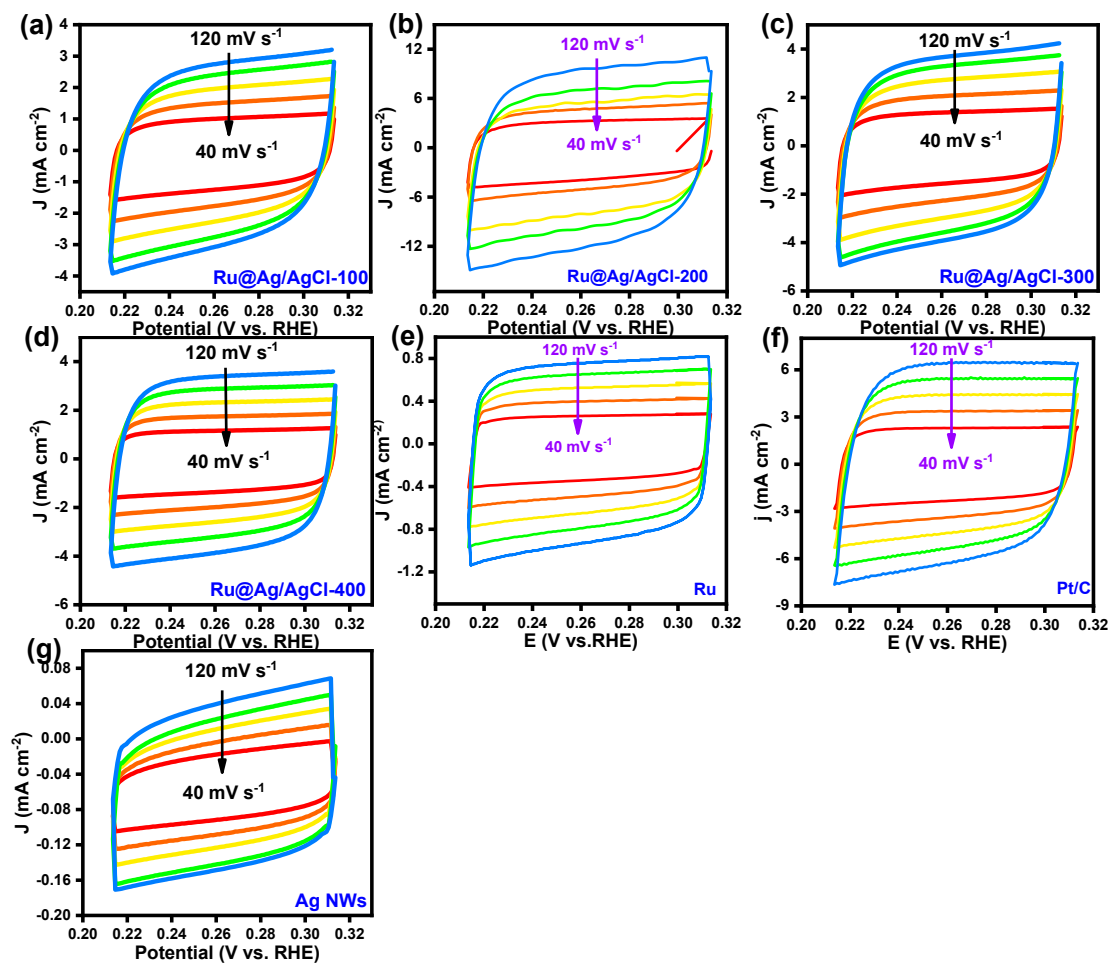

Fig. S3. Multi-CV images of (a) Ru@Ag/AgCl-100, (b) Ru@Ag/AgCl-200, (c) Ru@Ag/AgCl-300, (d) Ru@Ag/AgCl-400, (e) Ru, (f) Pt/C and (g) Ag NWs.

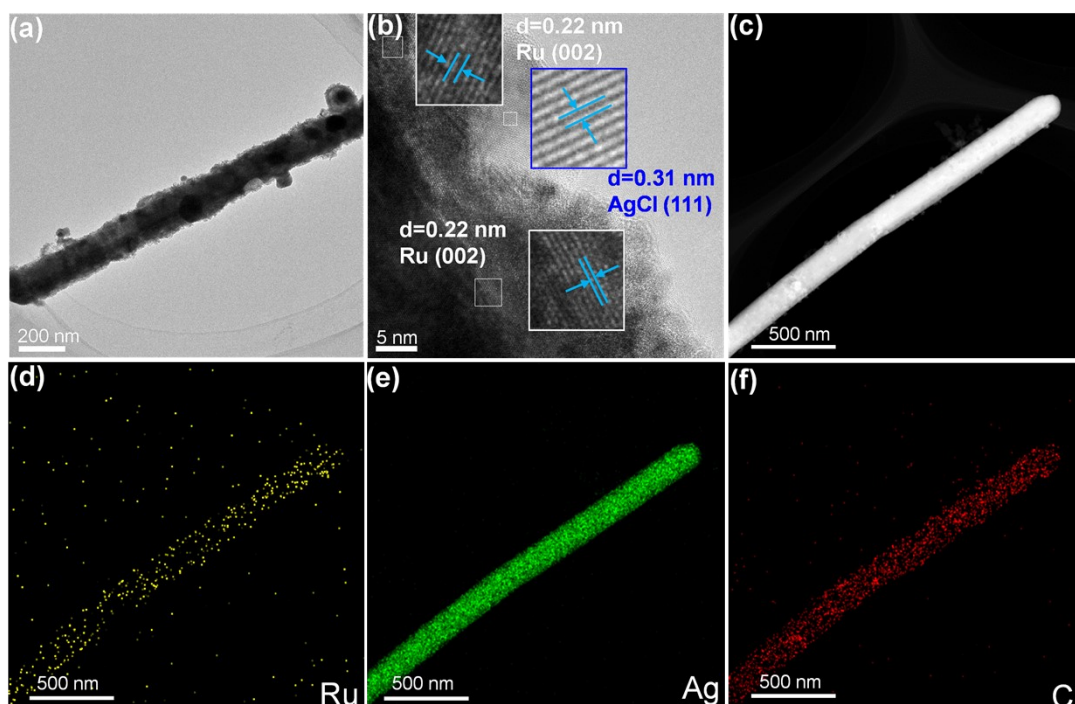

Fig. S4. (a) TEM, (b) HR-TEM and (c) EDS-Mapping for Ru@Ag/AgCl-100.

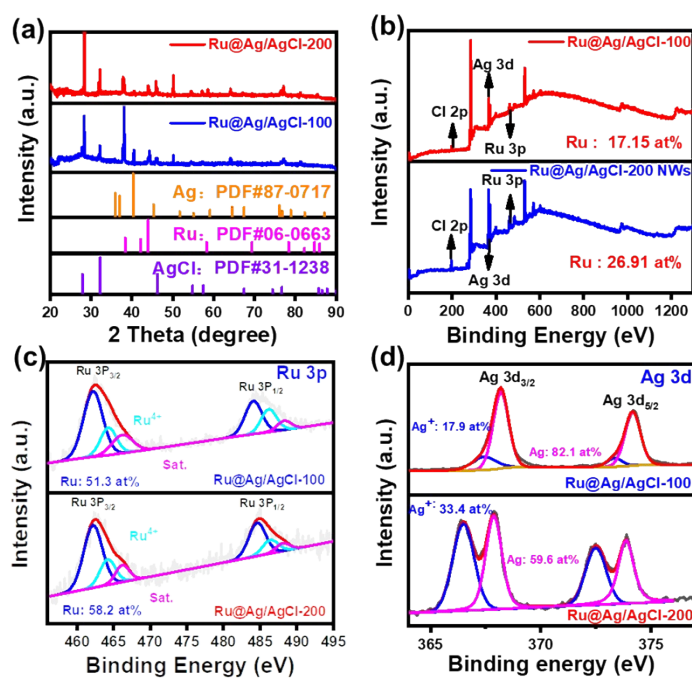

Fig. S5. Comparative (a) XRD, (b) X-ray photoelectron-spectroscopy (XPS), (c) Ru 3p and (d) Ag 3d images of Ru@Ag/AgCl-100 and Ru@Ag/AgCl-200.

Table S1. Inductively coupled plasma mass spectrometry (ICP-MS) results of Ru@Ag/AgCl-100 and Ru@Ag/AgCl-200.

| Catalyst       | Total mass (mg) | Ru content (at %) |
|----------------|-----------------|-------------------|
| Ru@Ag/AgCl-100 | 1 mg            | 6.891             |
| Ru@Ag/AgCl-200 | 1 mg            | 9.635             |

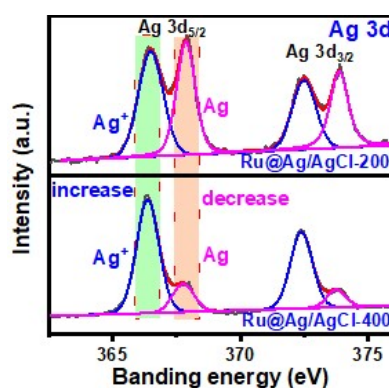

Fig. S6. Ag 3d image of Ru@Ag/AgCl-400 catalysts.

Table. S2. The comparative atomic retention rate of Ru in Ru@Ag/AgCl-200 catalysts and recent report values after CP measurements.

| Catalyst                   | Retention rate after CP test | Electrolyte | References                   |
|----------------------------|------------------------------|-------------|------------------------------|
| Ru(OH) <sub>x</sub> /Ag/NF | 96.79 %                      | 1M KOH      | 5                            |
| Mo <sub>x</sub> /Ru/C-3    | 61.00 %                      | 1M KOH      | 6                            |
| Ru hcp                     | 87.50 %                      | 1M KOH      | 7                            |
| Ru/meso-NC-300 °C          | 29.00 %                      | 1M KOH      | 8                            |
| Ru@Ag/AgCl-200             | 99.00 %                      | 1M KOH      | <a href="#">This article</a> |



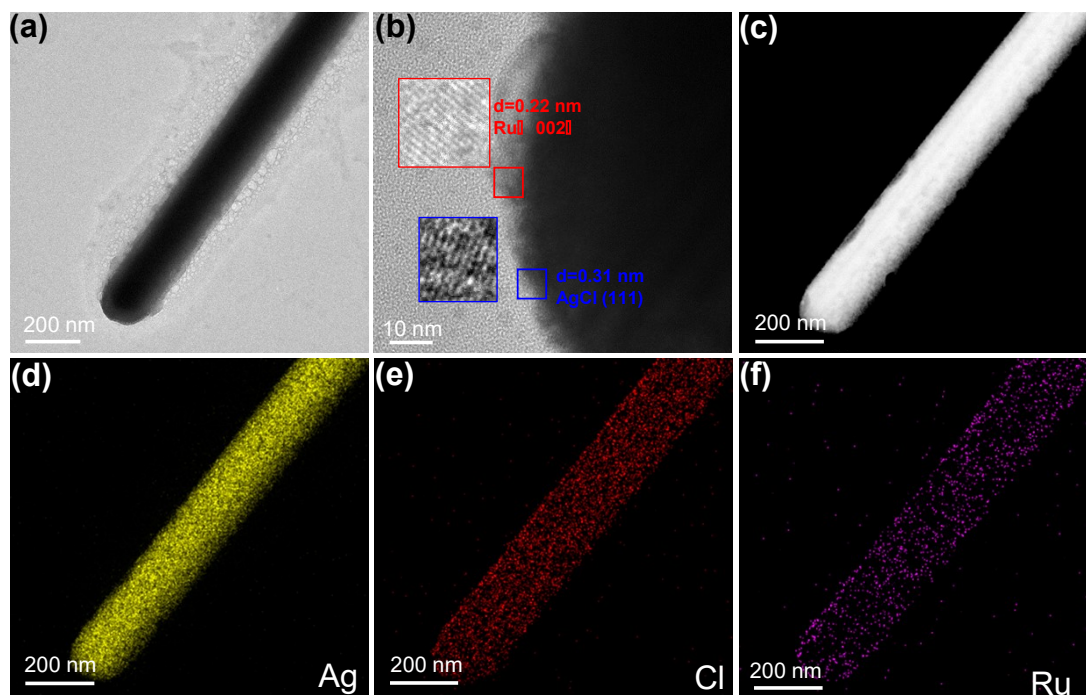

Fig. S7. (a) TEM, (b) HR-TEM, and (c-f) EDS-Mapping images of Ru@Ag/AgCl-200 after stability measurements for HER.

Table S3. Atomic ratio of Ru in Ru@Ag/AgCl-200 before and after stability measurement measured by ICP-MS.

| Ru@Ag/AgCl-200 | Total mass (mg) | Ru content (at %) |
|----------------|-----------------|-------------------|
| Before         | 1 mg            | 9.635             |
| After          | 1 mg            | 8.897             |

Table S4. A comparison of Ru concentration in the electrolyte after the stability test of Ru@Ag/AgCl-200 and Ru catalysts by ICP-MS.

| Electrolyte    | Volume (L) | The concentration of Ru ( $\mu\text{g/L}$ ) |
|----------------|------------|---------------------------------------------|
| Ru             | 0.05       | 333.151                                     |
| Ru@Ag/AgCl-200 | 0.05       | 143.632                                     |

## Reference:

1. V. D. Nithya, *Int. J. Hydrog. Energy*, 2021, **46**, 36080-36102.
2. D. Huang, X. Wu, M. Waqas, R. Wang, L. Wang, Q. Huang, X. Peng, D.-H. Chen, Y. Fan and W. Chen, *J. Electroanal. Chem.*, 2023, **947**.
3. Q. Huang, R. Ren, J. Li, M. Waqas, P. Chen, X. Liu, D. Huang, Z. Yang, X. Peng, D.-H. Chen, Y. Fan and W. Chen, *Catal. Sci. Technol.*, 2024, **14**, 667-672.
4. Q. Huang, M. Yang, K. K. Rani, L. Wang, R. Wang, X. Liu, D. Huang, Z. Yang, R. Devasenathipathy, D. H. Chen, Y. Fan and W. Chen, *Chem. Eur. J.*, 2023, **30**.
5. X.-Y. Zhang, B.-Y. Guo, F.-T. Li, B. Dong, J.-Q. Zhang, X. Ma, J.-Y. Xie, M. Yang, Y.-M. Chai and C.-G. Liu, *Int. J. Hydrogen Energy*, 2019, **44**, 21683-21691.
6. L. Zeng, Y. Zhu, D. Wu, D. Wang and Q. Zhou, *Surf.*, 2024, **45**, 103903.
7. F. Søndergaard-Pedersen, H. Lakhotiya, E. D. Bøjesen, M. Bondesgaard, M. Myekhlai, T. M. Benedetti, J. J. Gooding, R. D. Tilley and B. B. Iversen, *Catal. Sci. Technol.*, 2022, **12**, 3606-3613.
8. Q. Wu, H. Li, Y. Zhou, S. Lv, T. Chen, S. Liu, W. Li and Z. Chen, *Inorg. Chem.*, 2022, **61**, 11011-11021.
